# Supplementary material for: Milch, Brei & Fingerfood: Der Speiseplan im 1. Jahr
Source: Springer Nature journal article supplement (doi:10.1007/s43877-021-0095-5), 2021-05-01
Supplement: MOESM1 [file 19138288]

## Literatur

### zum Beitrag „Milch, Brei & Fingerfood: Der Speiseplan im 1. Jahr“ von Mathilde Kersting

HebammenWissen (2) 2/2021, S. 19-22

AAP. The Effects of Early Nutritional Interventions on the Development of Atopic Disease in Infants and Children: The Role of Maternal Dietary Restriction, Breastfeeding, Hydrolyzed Formulas, and Timing of Introduction of Allergenic Complementary Foods. Greer FE, Scott S, Sicherer H, Wesley Burks A, COMMITTEE ON NUTRITION, SECTION ON ALLERGY AND IMMUNOLOGY. *EDIATRICS* Volume 143, number 4, April 2019:e20190281

Delegierte Verordnung (EU) 2016/127 der Kommission - vom 25. September 2015 - zur Ergänzung der Verordnung (EU) Nr. 609/2013 des Europäischen Parlaments und des Rates im Hinblick auf die besonderen Zusammensetzungs- und Informationsanforderungen für Säuglingsanfangsnahrung und Folgenahrung und hinsichtlich der Informationen, die bezüglich der Ernährung von Säuglingen und Kleinkindern bereitzustellen sind.

Dube K, Schwartz J, Mueller M, et al. Complementary food with low (8%) or high (12%) meat content as source of dietary iron: a double-blinded randomized controlled trial. *Eur J Nutr* 2010; 49(1):11-18.

EFSA NDA Panel (EFSA Panel on Nutrition, Novel Foods and Food Allergens) Castenmiller J, de Henauw S, Hirsch-Ernst K, et al. Scientific Opinion on the appropriate age range for introduction of complementary feeding into an infant's diet. *EFSA Journal* 2019; 17(9):5780-6021

ESPGHAN Complementary Feeding. A Position Paper by the European Society for Paediatric Gastroenterology, Hepatology, and Nutrition (ESPGHAN) Committee on Nutrition. *J Pediatr Gastroenterol Nutr* 2017; 64(1): 119-132

FKE. Forschungsdepartment Kinderernährung. Empfehlungen für die Ernährung von Säuglingen. Bochum, 2019.

Handlungsempfehlungen des Netzwerks ‚Gesund ins Leben‘ Koletzko B, Bauer C-P, Cierpka M, Cremer M, Flothkötter M, Graf C et al.: Ernährung und Bewegung von Säuglingen und stillenden Frauen. *Monatsschr Kinderheilkd* 2016;164(9):771-798.

Horta BL, Loret de Mola C, Victora CG: Long-term consequences of breastfeeding on cholesterol, obesity, systolic blood pressure and type 2 diabetes: a systematic review and meta-analysis. *Acta Paediatr* 2015;104:30-37

Kalhoff H, Kersting M. Breastfeeding or formula feeding and iron status in the second 6 months of life: a critical role for complementary feeding. *J Pediatr* 2017; 187: 333

Kersting M. Vom Stillen zur Familienkost – (wie) ist Beikost ohne Brei möglich? *Die Hebamme* 2016;29:268-272

Kersting M, Kalhoff H, Voss S, Jansen K, Lücke T. Translation of EU food law and nutrient reference values into practice -the German Dietary Scheme for the 1<sup>st</sup> year of life. *J Pediatr Gastroenterol Nutr* 2020; 71(4):550-556.

Largo RH. Babyjahre. Entwicklung und Erziehung in den ersten vier Jahren. Piper, München, 2019

Maier-Nöth A, Schaal B, Leathwood P, Issanchou S. The lasting influences of early food-related variety experience: a longitudinal study of vegetable acceptance from 5 months to 6 years in two populations. PLoS ONE [serial online] March 2016; 11[3], e0151356. <https://doi.org/10.1371/journal.pone.0151356>.

Remer T, Johnner SA, Gärtner R, et al. Jodmangel im Säuglingsalter – ein Risiko für die kognitive Entwicklung. *Deutsch Med Wochenschr* 2010; 135(31-32):1551-56

S3-Leitlinie Allergieprävention – Update 2014. Schäfer T, Bauer CP, Beyer K, et al. *Allergo-Journal* 2014; 23: 32-47.

Victora CG, Bahl R, Barros AJD et al.: Breastfeeding in the 21st century: epidemiology, mechanisms, and lifelong effect. *Lancet* 2016;387:475–490
